# Supplementary material
Source: PubMed Central journal article supplement (PMC10693991)
Supplement: NIHMS1943195-supplement-Supplemental_tables.pdf [file NIHMS1943195-supplement-Supplemental_tables.pdf]

**Title of manuscript:** Leukocyte Telomere Length, Cancer Incidence and All-cause Mortality among Chinese Adults: Singapore Chinese Health Study

**Authors' names:** Hamed Samavat, Hung N. Luu, Kenneth B. Beckman, Aizhen Jin, Renwei Wang, Woon-Puay Koh, Jian-Min Yuan

**Table of contents:**

**Supplementary table 1.** Associations between relative telomere length and risk of all-cause or cause-specific mortality, the Singapore Chinese Health Study.....Page 2

**Supplementary table 2.** Associations between relative telomere length and risk of total cancer and cancer-specific incidence, the Singapore Chinese Health Study.....Page 5

**SUPPLEMENTARY TABLE 1**

Associations between relative telomere length and risk of all-cause or cause-specific mortality, the Singapore Chinese Health Study

| <b>Disease category</b>                  | <b>Q1<br/>(0.70- 0.80)§</b> | <b>Q2<br/>(0.86- 0.92)§</b> | <b>Q3<br/>(0.97- 1.02)§</b> | <b>Q4<br/>(1.08- 1.15)§</b> | <b>Q5<br/>(1.24- 1.42)§</b> | <b>P trend</b> |
|------------------------------------------|-----------------------------|-----------------------------|-----------------------------|-----------------------------|-----------------------------|----------------|
| <b>Number of participants</b>            | 5625                        | 5625                        | 5625                        | 5625                        | 5625                        | -              |
| <b>Person-years of follow-up</b>         | 72610                       | 76082                       | 77884                       | 79268                       | 81339                       | -              |
| <b>All-cause mortality</b>               |                             |                             |                             |                             |                             |                |
| Deaths (n)                               | 2098                        | 1605                        | 1463                        | 1264                        | 1179                        | -              |
| HR <sup>1</sup> (95% CI)                 | 1.00 (ref)                  | 0.90 (0.84, 0.96)           | 0.91 (0.85, 0.97)           | 0.90 (0.84, 0.97)           | 0.93 (0.86, 1.00)           | 0.03           |
| <b>Cancer mortality</b>                  |                             |                             |                             |                             |                             |                |
| Deaths (n)                               | 634                         | 524                         | 529                         | 468                         | 505                         | -              |
| HR <sup>1</sup> (95% CI)                 | 1.00 (ref)                  | 0.94 (0.84, 1.06)           | 1.02 (0.91, 1.15)           | 1.02 (0.90, 1.15)           | 1.19 (1.05, 1.34)           | 0.005          |
| <b>Non-cancer mortality</b>              |                             |                             |                             |                             |                             |                |
| Deaths (n)                               | 1464                        | 1081                        | 934                         | 796                         | 674                         | -              |
| HR <sup>1</sup> (95% CI)                 | 1.00 (ref)                  | 0.88 (0.82, 0.96)           | 0.86 (0.79, 0.93)           | 0.85 (0.78, 0.93)           | 0.80 (0.73, 0.88)           | <0.0001        |
| <b>Cardiovascular diseases mortality</b> |                             |                             |                             |                             |                             |                |
| Deaths (n)                               | 644                         | 506                         | 425                         | 388                         | 331                         | -              |
| HR <sup>1</sup> (95% CI)                 | 1.00 (ref)                  | 0.93 (0.83, 1.04)           | 0.87 (0.77, 0.98)           | 0.90 (0.79, 1.03)           | 0.85 (0.74, 0.98)           | 0.01           |

**SUPPLEMENTARY TABLE 1; Cont'd.**

| <b>Disease category</b>                  | <b>Q1<br/>(0.70- 0.80)§</b> | <b>Q2<br/>(0.86- 0.92)§</b> | <b>Q3<br/>(0.97- 1.02)§</b> | <b>Q4<br/>(1.08- 1.15)§</b> | <b>Q5<br/>(1.24- 1.42)§</b> | <b>P trend</b> |
|------------------------------------------|-----------------------------|-----------------------------|-----------------------------|-----------------------------|-----------------------------|----------------|
| <b>Ischemic heart diseases mortality</b> |                             |                             |                             |                             |                             |                |
| Deaths (n)                               | 353                         | 308                         | 238                         | 224                         | 176                         | -              |
| HR <sup>1</sup> (95% CI)                 | 1.00 (ref)                  | 1.04 (0.89, 1.21)           | 0.91 (0.77, 1.07)           | 0.97 (0.82, 1.15)           | 0.85 (0.70, 1.02)           | 0.07           |
| <b>Stroke mortality</b>                  |                             |                             |                             |                             |                             |                |
| Deaths (n)                               | 183                         | 105                         | 120                         | 104                         | 97                          | -              |
| HR <sup>1</sup> (95% CI)                 | 1.00 (ref)                  | 0.66 (0.52, 0.85)           | 0.84 (0.66, 1.05)           | 0.83 (0.65, 1.05)           | 0.84 (0.65, 1.09)           | 0.38           |
| <b>COPD and pneumonia mortality</b>      |                             |                             |                             |                             |                             |                |
| Deaths (n)                               | 507                         | 332                         | 291                         | 208                         | 185                         | -              |
| HR <sup>1</sup> (95% CI)                 | 1.00 (ref)                  | 0.82 (0.71, 0.94)           | 0.84 (0.72, 0.97)           | 0.74 (0.63, 0.87)           | 0.76 (0.64, 0.91)           | 0.0002         |
| <b>Digestive diseases‡ mortality</b>     |                             |                             |                             |                             |                             |                |
| Deaths (n)                               | 42                          | 46                          | 35                          | 18                          | 17                          | -              |
| HR <sup>1</sup> (95% CI)                 | 1.00 (ref)                  | 1.27 (0.83, 1.93)           | 1.05 (0.67, 1.65)           | 0.60 (0.35, 1.06)           | 0.64 (0.36, 1.14)           | 0.02           |
| <b>Urinary tract diseases¶ mortality</b> |                             |                             |                             |                             |                             |                |
| Deaths (n)                               | 92                          | 72                          | 76                          | 58                          | 51                          | -              |
| HR <sup>1</sup> (95% CI)                 | 1.00 (ref)                  | 0.90 (0.66, 1.23)           | 1.07 (0.79, 1.45)           | 0.90 (0.65, 1.26)           | 0.89 (0.63, 1.27)           | 0.60           |

**SUPPLEMENTARY TABLE 1; Cont'd.**

| <b>Disease category</b>         | <b>Q1<br/>(0.70- 0.80)§</b> | <b>Q2<br/>(0.86- 0.92)§</b> | <b>Q3<br/>(0.97- 1.02)§</b> | <b>Q4<br/>(1.08- 1.15)§</b> | <b>Q5<br/>(1.24- 1.42)§</b> | <b><i>P</i> trend</b> |
|---------------------------------|-----------------------------|-----------------------------|-----------------------------|-----------------------------|-----------------------------|-----------------------|
| <b>Other diseases mortality</b> |                             |                             |                             |                             |                             |                       |
| Deaths (n)                      | 312                         | 243                         | 218                         | 200                         | 158                         | -                     |
| HR <sup>1</sup> (95% CI)        | 1.00 (ref)                  | 0.90 (0.76, 1.06)           | 0.88 (0.74, 1.05)           | 0.89 (0.74, 1.07)           | 0.77 (0.63, 0.94)           | 0.02                  |

Abbreviations: CI, confidence intervals; COPD, chronic obstructive pulmonary disease; HR, hazard ratio.

§ Numbers inside the parentheses are interquartile ranges.

‡ Based on the International Classification of Diseases (ICD) 9th revision codes of 520-579 and the ICD 10th revision codes of K00-K95.

¶ Based on the International Classification of Diseases (ICD) 9th revision codes of 580-629 and the ICD 10th revision codes of N00-N99.

<sup>1</sup> Hazard ratio and P values were derived from the Cox proportional hazard regression model that included age at blood collection (years), sex (men or women), dialect group (Hokkien or Cantonese), BMI (<18.5, 18.5-<23, 23-<27.5, 27.5+ kg/m<sup>2</sup>), level of education (no formal education, primary school, or secondary school and above), smoking status (never, former, or current smoker), number of cigarettes per day, number of years of smoking, alcohol consumption (non-drinker, <7, or ≥7 drinks per week), weekly vigorous work or strenuous sports (no or yes), number hours of sleep per night (≤6, 7–8, or ≥9), self-reported history of physician-diagnosed diabetes mellitus (yes or no), and hypertension (yes or no).

**SUPPLEMENTARY TABLE 2**

Associations between relative telomere length and risk of total cancer and cancer-specific incidence, the Singapore Chinese Health Study

| Type of cancer                   | Q1<br>(0.70- 0.80)§ | Q2<br>(0.86- 0.92)§ | Q3<br>(0.97- 1.02)§ | Q4<br>(1.08- 1.15)§ | Q5<br>(1.24- 1.42)§ | <i>P</i> trend |
|----------------------------------|---------------------|---------------------|---------------------|---------------------|---------------------|----------------|
| <b>Number of participants</b>    | 5308                | 5308                | 5308                | 5308                | 5308                | -              |
| <b>Person-years of follow-up</b> | 63126               | 65745               | 66825               | 67927               | 69324               | -              |
| <b>Total cancer</b>              |                     |                     |                     |                     |                     |                |
| Cases (n)                        | 927                 | 822                 | 874                 | 819                 | 911                 | -              |
| HR <sup>1</sup> (95% CI)         | 1.00 (ref)          | 0.96 (0.88,1.06)    | 1.08 (0.99,1.19)    | 1.09 (0.99,1.20)    | 1.30 (1.18,1.43)    | <0.0001        |
| <b>Head and neck cancer</b>      |                     |                     |                     |                     |                     |                |
| Cases (n)                        | 36                  | 31                  | 40                  | 32                  | 28                  | -              |
| HR <sup>1</sup> (95% CI)         | 1.00 (ref)          | 0.95 (0.59,1.54)    | 1.29 (0.82,2.04)    | 1.14 (0.70,1.86)    | 1.07 (0.64,1.78)    | 0.55           |
| <b>Stomach cancer</b>            |                     |                     |                     |                     |                     |                |
| Cases (n)                        | 77                  | 44                  | 48                  | 55                  | 48                  | -              |
| HR <sup>1</sup> (95% CI)         | 1.00 (ref)          | 0.65 (0.45,0.94)    | 0.76 (0.53,1.10)    | 0.95 (0.67,1.36)    | 0.93 (0.64,1.35)    | 0.82           |
| <b>Colon cancer</b>              |                     |                     |                     |                     |                     |                |
| Cases (n)                        | 116                 | 107                 | 107                 | 108                 | 96                  | -              |
| HR <sup>1</sup> (95% CI)         | 1.00 (ref)          | 1.02 (0.78,1.33)    | 1.08 (0.83,1.41)    | 1.19 (0.91,1.55)    | 1.15 (0.87,1.53)    | 0.17           |

**SUPPLEMENTARY TABLE 2; Cont'd.**

| Type of cancer                    | Q1<br>(0.70- 0.80)§ | Q2<br>(0.86- 0.92)§ | Q3<br>(0.97- 1.02)§ | Q4<br>(1.08- 1.15)§ | Q5<br>(1.24- 1.42)§ | P trend |
|-----------------------------------|---------------------|---------------------|---------------------|---------------------|---------------------|---------|
| <b>Rectal cancer</b>              |                     |                     |                     |                     |                     |         |
| Cases (n)                         | 67                  | 64                  | 62                  | 47                  | 73                  | -       |
| HR <sup>1</sup> (95% CI)          | 1.00 (ref)          | 1.09 (0.77,1.53)    | 1.15 (0.81,1.63)    | 0.96 (0.66,1.41)    | 1.67 (1.18,2.35)    | 0.02    |
| <b>Pancreatic cancer</b>          |                     |                     |                     |                     |                     |         |
| Cases (n)                         | 21                  | 22                  | 27                  | 16                  | 32                  | -       |
| HR <sup>1</sup> (95% CI)          | 1.00 (ref)          | 1.17 (0.64,2.14)    | 1.55 (0.87,2.75)    | 1.01 (0.52,1.95)    | 2.21 (1.25,3.90)    | 0.02    |
| <b>Squamous cell carcinoma</b>    |                     |                     |                     |                     |                     |         |
| Cases (n)                         | 29                  | 33                  | 20                  | 20                  | 16                  | -       |
| HR <sup>1</sup> (95% CI)          | 1.00 (ref)          | 1.41 (0.86,2.33)    | 0.99 (0.55,1.76)    | 1.21 (0.68,2.17)    | 1.13 (0.60,2.12)    | 0.87    |
| <b>Lung adenocarcinoma cancer</b> |                     |                     |                     |                     |                     |         |
| Cases (n)                         | 47                  | 54                  | 66                  | 50                  | 92                  | -       |
| HR <sup>1</sup> (95% CI)          | 1.00 (ref)          | 1.30 (0.88,1.92)    | 1.71 (1.17,2.50)    | 1.45 (0.97,2.17)    | 2.87 (1.99,4.13)    | <.0001  |
| <b>Breast cancer</b>              |                     |                     |                     |                     |                     |         |
| Cases (n)                         | 59                  | 71                  | 90                  | 121                 | 128                 | -       |
| HR <sup>2</sup> (95% CI)          | 1.00 (ref)          | 1.04 (0.74,1.47)    | 1.20 (0.86,1.67)    | 1.44 (1.05,1.98)    | 1.43 (1.04,1.96)    | 0.003   |
| <b>Uterine cancer</b>             |                     |                     |                     |                     |                     |         |
| Cases (n)                         | 26                  | 16                  | 24                  | 42                  | 41                  | -       |
| HR <sup>2</sup> (95% CI)          | 1.00 (ref)          | 0.52 (0.28,0.97)    | 0.72 (0.41,1.26)    | 1.13 (0.69,1.86)    | 1.03 (0.62,1.70)    | 0.14    |

**SUPPLEMENTARY TABLE 2; Cont'd.**

| Type of cancer           | Q1<br>(0.70- 0.80)§ | Q2<br>(0.86- 0.92)§ | Q3<br>(0.97- 1.02)§ | Q4<br>(1.08- 1.15)§ | Q5<br>(1.24- 1.42)§ | P trend |
|--------------------------|---------------------|---------------------|---------------------|---------------------|---------------------|---------|
| <b>Bladder cancer</b>    |                     |                     |                     |                     |                     |         |
| Cases (n)                | 30                  | 22                  | 16                  | 25                  | 24                  | -       |
| HR <sup>1</sup> (95% CI) | 1.00 (ref)          | 0.88 (0.51,1.53)    | 0.72 (0.39,1.33)    | 1.3 (0.75,2.23)     | 1.45 (0.83,2.53)    | 0.12    |
| <b>Prostate cancer</b>   |                     |                     |                     |                     |                     |         |
| Cases (n)                | 79                  | 86                  | 91                  | 71                  | 71                  | -       |
| HR <sup>1</sup> (95% CI) | 1.00 (ref)          | 1.29 (0.95,1.76)    | 1.52 (1.12,2.06)    | 1.42 (1.03,1.97)    | 1.60 (1.15,2.23)    | 0.004   |
| <b>Lymphoma cancer</b>   |                     |                     |                     |                     |                     |         |
| Cases (n)                | 29                  | 22                  | 37                  | 21                  | 23                  | -       |
| HR <sup>1</sup> (95% CI) | 1.00 (ref)          | 0.79 (0.45,1.38)    | 1.37 (0.84,2.25)    | 0.82 (0.46,1.45)    | 0.94 (0.54,1.66)    | 0.92    |
| <b>Other cancers</b>     |                     |                     |                     |                     |                     |         |
| Cases (n)                | 182                 | 157                 | 159                 | 157                 | 168                 | -       |
| HR <sup>1</sup> (95% CI) | 1.00 (ref)          | 0.95 (0.76,1.17)    | 1.02 (0.82,1.27)    | 1.09 (0.88,1.36)    | 1.26 (1.01,1.57)    | 0.02    |

Abbreviations: CI, confidence intervals; HR, hazard ratio.

§ Numbers inside the parentheses are interquartile ranges.

<sup>1</sup> Hazard ratio and P values were derived from the Cox proportional hazard regression model that included age at blood collection (years), sex (men or women), dialect group (Hokkien or Cantonese), BMI (<18.5, 18.5-<23, 23-<27.5, 27.5+ kg/m<sup>2</sup>), level of education (no formal education, primary school, or secondary school and above), smoking status (never, former, or current smoker), number of cigarettes per day, number of years of smoking, alcohol consumption (non-drinker, <7, or ≥7 drinks per week), weekly vigorous work or strenuous sports (no or yes), number hours of sleep per night (≤6, 7–8, or ≥9), self-reported history of physician-diagnosed diabetes mellitus (yes or no), and hypertension (yes or no).

<sup>2</sup> Hazard ratio and P values were derived from the Cox proportional hazard regression model that included age at blood collection (years), dialect group (Hokkien or Cantonese), BMI (<18.5, 18.5-<23, 23-<27.5, 27.5+ kg/m<sup>2</sup>), level of education (no formal education, primary school, or secondary school and above), age when period became regular, age at first live birth (<10, 21-25, 26-30, or ≥31 years), number of live births (0, 1-2, 3-4, or ≥5), age at menopause (≤49, 50-54, or ≥55 years), use of hormone therapy (never, ever, or current), use of oral contraceptives (no or yes), family history of breast cancer (no or yes), smoking status (never, former, or current smoker), alcohol consumption (non-drinker, <7, or ≥7 drinks per week), weekly vigorous work or strenuous sports (no or yes), number hours of sleep per night (≤6, 7-8, or ≥9), self-reported history of physician-diagnosed diabetes mellitus (yes or no), and hypertension (yes or no).
